# Supplementary material for: Prevalence and Disability-Adjusted Life Year Rates of Asthma in China: Findings from the GBD Study 2019 of the G20
Source: MDPI journal article supplement (doi:10.3390/ijerph192214663), 2022-11-08
Supplement: s1 [file s1]

**Table S1.** The asthma prevalence and DALYs rate in China in 1990 and 2019. DALYs: disability-adjusted life years.

| Age      | 1990 Prevalence,<br>per 100,000 |         |         | 2019 Prevalence,<br>per 100,000 |         |         | 1990 DALYs Rate,<br>per 100,000 |         |         | 2019 DALYs Rate,<br>per 100,000 |        |        |
|----------|---------------------------------|---------|---------|---------------------------------|---------|---------|---------------------------------|---------|---------|---------------------------------|--------|--------|
|          | Both                            | Male    | Female  | Both                            | Male    | Female  | Both                            | Male    | Female  | Both                            | Male   | Female |
| 1 to 4   | 3030.70                         | 3312.01 | 2716.60 | 3085.57                         | 3469.91 | 2637.43 | 199.90                          | 207.81  | 191.06  | 128.15                          | 143.94 | 109.74 |
| 5 to 9   | 4396.72                         | 5008.67 | 3733.67 | 4343.04                         | 4991.35 | 3580.11 | 198.05                          | 225.14  | 168.69  | 178.14                          | 204.74 | 146.85 |
| 10 to 14 | 2980.30                         | 3394.15 | 2538.74 | 2898.71                         | 3268.75 | 2460.14 | 136.54                          | 154.75  | 117.11  | 118.86                          | 134.18 | 100.69 |
| 15 to 19 | 1973.93                         | 2136.84 | 1801.94 | 1914.71                         | 2055.56 | 1753.53 | 96.96                           | 103.11  | 90.47   | 79.56                           | 85.39  | 72.90  |
| 20 to 24 | 1325.30                         | 1375.06 | 1273.24 | 1267.36                         | 1332.30 | 1196.32 | 74.62                           | 80.19   | 68.79   | 55.12                           | 59.01  | 50.87  |
| 25 to 29 | 1176.54                         | 1170.02 | 1183.42 | 1110.11                         | 1143.84 | 1075.14 | 75.95                           | 79.00   | 72.74   | 50.26                           | 53.64  | 46.76  |
| 30 to 34 | 1257.21                         | 1201.71 | 1317.69 | 1159.19                         | 1164.21 | 1154.06 | 83.33                           | 82.00   | 84.79   | 53.31                           | 55.30  | 51.29  |
| 35 to 39 | 1392.70                         | 1292.90 | 1499.58 | 1234.00                         | 1221.58 | 1246.90 | 100.57                          | 95.19   | 106.32  | 59.00                           | 60.66  | 57.28  |
| 40 to 44 | 1533.63                         | 1412.72 | 1666.94 | 1294.30                         | 1279.20 | 1310.03 | 127.40                          | 117.78  | 138.01  | 65.75                           | 68.01  | 63.40  |
| 45 to 49 | 1641.27                         | 1561.31 | 1730.61 | 1304.78                         | 1307.30 | 1302.16 | 147.38                          | 141.41  | 154.05  | 67.47                           | 70.86  | 63.94  |
| 50 to 54 | 1744.26                         | 1748.11 | 1739.92 | 1296.75                         | 1329.55 | 1263.64 | 183.80                          | 194.24  | 172.06  | 72.61                           | 80.45  | 64.70  |
| 55 to 59 | 1974.98                         | 2052.02 | 1890.10 | 1347.05                         | 1419.16 | 1274.27 | 238.47                          | 260.89  | 213.76  | 83.17                           | 95.79  | 70.43  |
| 60 to 64 | 2443.75                         | 2612.05 | 2264.94 | 1492.03                         | 1628.70 | 1354.06 | 328.21                          | 362.20  | 292.09  | 102.11                          | 122.66 | 81.38  |
| 65 to 69 | 3456.01                         | 3869.58 | 3056.03 | 1853.31                         | 2154.49 | 1562.96 | 488.05                          | 575.70  | 403.27  | 137.06                          | 171.45 | 103.91 |
| 70 to 74 | 4604.24                         | 5340.08 | 3968.07 | 2340.00                         | 2850.40 | 1854.56 | 816.06                          | 969.74  | 683.20  | 210.55                          | 271.50 | 152.58 |
| 75 to 79 | 4893.83                         | 5740.45 | 4254.24 | 2644.88                         | 3254.43 | 2096.36 | 1113.74                         | 1304.49 | 969.64  | 299.56                          | 388.00 | 219.96 |
| 80 to 84 | 4494.96                         | 5261.25 | 4013.60 | 2817.66                         | 3524.13 | 2264.28 | 1397.62                         | 1580.57 | 1282.69 | 421.89                          | 543.73 | 326.46 |
| 85 to 89 | 4205.52                         | 4852.54 | 3912.12 | 3089.16                         | 4307.37 | 2432.89 | 1663.95                         | 2055.46 | 1486.41 | 539.36                          | 818.30 | 389.09 |
| 90 to 94 | 4037.44                         | 4570.98 | 3910.29 | 3101.28                         | 5454.09 | 2611.96 | 1605.01                         | 2052.07 | 1498.47 | 522.28                          | 930.19 | 437.44 |
| 95 plus  | 4051.64                         | 4466.50 | 3985.36 | 3095.19                         | 6459.32 | 2798.67 | 1366.12                         | 1533.41 | 1339.39 | 541.81                          | 753.04 | 523.19 |
